# Supplementary material
Source: publisher figshare collection journal article supplement (https://frontiersin.figshare.com/ndownloader/files/35676866)
Supplement: Supplementary file 1 [file 35676866]

Table S1. Activities that form the basis of relationships between coffee value chain actors in NE Peru.

| **Service or Supply Provider** | **Resource Influencing Activities** | **Beneficiaries (Directly Affected Actors)** | **Resource Affected** |
| --- | --- | --- | --- |
| Intermediaries | - Provide advances in form of food or other supplies. | Farmers (Base Producers) | financial |
| Cooperatives & Associations | - Provide access to technical assistance, plant material, technology, and technical training. - Provide access to certifications. - May facilitate access to credit or advances. | Farmers | human, financial, physical |
| Private Companies | - May provide support services, complementing or replacing other actors in this role (e.g., hiring of consultants for technical service provision for farmers with buy-agreements, development of improved varieties). - Provide transportation services and advances on the harvest in some cases. - In some cases, guarantee purchases from certain farmers or organizations via buyer’s agreements or contracts. - May promote participation of farmers (cooperative members and independent coffee providers) in certification programs from within the value chain (via external consultants or internal sustainability standards, paying premium for certified coffees) - May participate in larger development projects (usually managed by development institutions). | Farmers | financial, human, physical |
| Supply Stores and Wholesalers | - Provide the materials used for production such as: fertilizers, manure, tools, agricultural chemicals, seeds, coffee seedlings, and machinery. - Implement programs to accompany farmers in improving productivity, in the case of at least one company. | Farmers//Cooperatives & associations | physical |
| Private Banks, Rural Savings Banks | - Provide credits with varying interest rates (in the case of savings and credit unions, the *Banco Agrario* or rural savings banks). | Farmers//Cooperatives & associations | financial |
| Public Institutions//Agencies | - Provide services to farmers. - Provide access and training in technologies and innovations (e.g., new & resistant planting material, agroforestry management, OPS) - Contribute to building an enabling framework for promoting the coffee sector. | Farmers//Cooperatives & associations | human, physical, financial |
